# Supplementary material
Source: HighWire-hosted journal article supplement (https://jnm.snmjournals.org/highwire/filestream/94624/field_highwire_adjunct_files/0/138636_Supplemental_Data.pdf)
Supplement: 138636_Supplemental_Data.pdf [file 138636_Supplemental_Data.pdf]

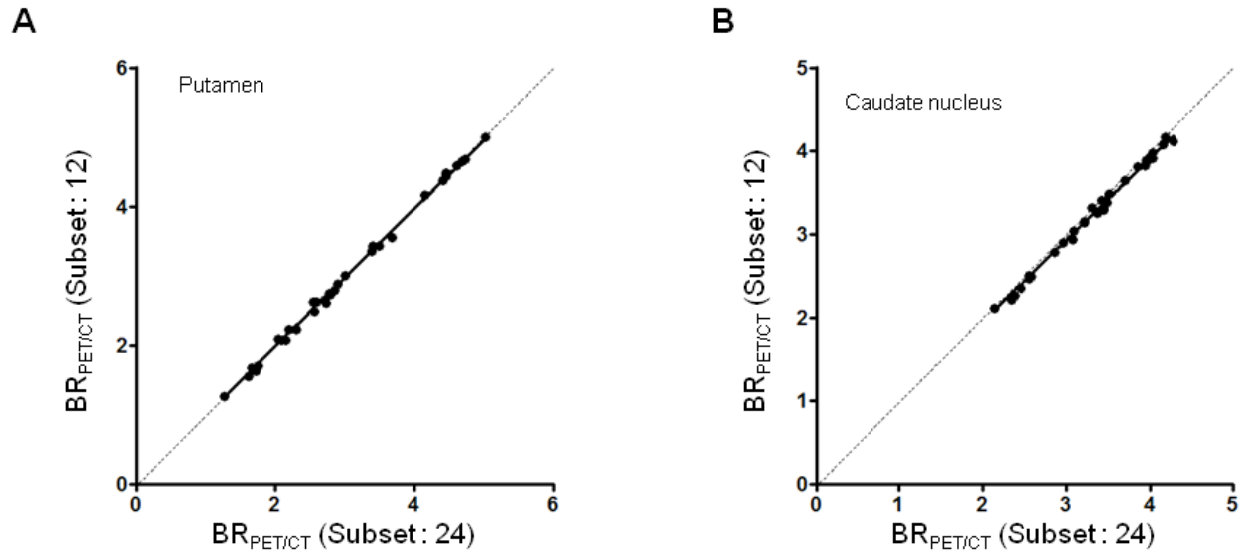

**Supplemental Figure 1.** Effects of number of subsets on quantification. The difference of DAT BR of putamen (A) and caudate nucleus (B) between two PET images generated by different reconstruction parameters was negligible compared to attenuation correction effects (ICC for putamen was 0.999, 95% C.I. 0.998 to 1.000 and ICC for caudate nucleus was 0.995, 95% C.I. 0.66 to 1.00).
